# Supplementary material for: Acceptance and Commitment Therapy versus Social Support for Smoking Cessation for People with Schizophrenia: A Randomised Controlled Trial
Source: MDPI journal article supplement (doi:10.3390/jcm10194304), 2021-09-22

Table S1 Outline of the ACT sessions for smoking cessation

| Session | ACT Processes            | Session plan                                                                                                                                                                                                                                                                                                                                                                                                                                                                                                  |
|---------|--------------------------|---------------------------------------------------------------------------------------------------------------------------------------------------------------------------------------------------------------------------------------------------------------------------------------------------------------------------------------------------------------------------------------------------------------------------------------------------------------------------------------------------------------|
| 1       | Values                   | <ul style="list-style-type: none"> <li>-Explore the patient's values related to smoking cessation.</li> <li>-Identify treatment goals and link them to the values.</li> <li>-Support the patient's goal of either no smoking or reduced and controlled amounts of smoking.</li> </ul>                                                                                                                                                                                                                         |
|         | Acceptance               | <ul style="list-style-type: none"> <li>-Identify the distinction between smoking and urges to smoke.</li> </ul>                                                                                                                                                                                                                                                                                                                                                                                               |
| 2       | Acceptance               | <ul style="list-style-type: none"> <li>-Discuss the short-term versus long-term effectiveness of attempts to control urges.</li> <li>-Identify the negative impacts of attempts to control urges.</li> <li>-Highlight the paradoxical nature of attempts to control urges, using the Person in the Hole metaphor.</li> <li>-Reinforce the futility of attempts to control urges.</li> <li>-Identify attempts to control urges as part of the problem, using the pink elephant and dim sum exercise</li> </ul> |
| 3       | Acceptance               | <ul style="list-style-type: none"> <li>-Introduce acceptance as an alternative to control, using the tug of war with a monster metaphor.</li> <li>-Review acceptance by demonstrating that the willingness to experience urges is a chosen behaviour and an alternative to control, using the tug of war with a monster metaphor.</li> <li>-Identify the decrease in effort required to willingly experience urges.</li> </ul>                                                                                |
|         | Values                   | <ul style="list-style-type: none"> <li>-Briefly discuss the patient's values to give purpose and meaning to acceptance.</li> <li>-Discuss what could be gained by letting go of the control agenda.</li> </ul>                                                                                                                                                                                                                                                                                                |
|         | Committed action         | <ul style="list-style-type: none"> <li>-Make behavioural commitments to gradually reduce smoking.</li> </ul>                                                                                                                                                                                                                                                                                                                                                                                                  |
| 4-7     | Defusion                 | <ul style="list-style-type: none"> <li>-Teach the limits of language and its role in suffering.</li> <li>-Undermine cognitive fusion, using the passengers on the bus metaphor.</li> </ul>                                                                                                                                                                                                                                                                                                                    |
|         | Self as context          | <ul style="list-style-type: none"> <li>-Identify the self as the context in which inner experiences occur, using the chessboard metaphor.</li> <li>-Explain that the patient can't choose what inner experiences occur, but can choose what to do with them.</li> </ul>                                                                                                                                                                                                                                       |
|         | Present-moment awareness | <ul style="list-style-type: none"> <li>-Help the patient be present with inner experiences.</li> <li>-Identify the importance of being present while not being heavily attached to inner experiences.</li> </ul>                                                                                                                                                                                                                                                                                              |
|         | Acceptance               | <ul style="list-style-type: none"> <li>-Identify opportunities for acceptance from out-of-session practise.</li> <li>-Encourage acceptance of any problematic inner experiences.</li> </ul>                                                                                                                                                                                                                                                                                                                   |
|         | Committed action         | <ul style="list-style-type: none"> <li>-Make behavioural commitments to continue to reduce smoking.</li> <li>-Make behavioural commitments to engage in values-based activities instead of attempting to control urges.</li> </ul>                                                                                                                                                                                                                                                                            |
| 8-9     | Values                   | <ul style="list-style-type: none"> <li>-Define the concept of values.</li> <li>-Clarify the patient's values and assess the consistency of his or her behaviour with those values, using the values assessment worksheet.</li> </ul>                                                                                                                                                                                                                                                                          |
|         | Committed action         | <ul style="list-style-type: none"> <li>-Make behavioural commitments to continue to reduce smoking.</li> <li>-Increase behavioural commitments to engage in value-based living, based on recent values work.</li> <li>-Discuss relapse management using ACT skills.</li> </ul>                                                                                                                                                                                                                                |
| 10      | Termination              | <ul style="list-style-type: none"> <li>-Review any processes that still need attention.</li> </ul>                                                                                                                                                                                                                                                                                                                                                                                                            |

|  |  |                                                                                                                                                                                                                                                                          |
|--|--|--------------------------------------------------------------------------------------------------------------------------------------------------------------------------------------------------------------------------------------------------------------------------|
|  |  | <ul style="list-style-type: none"><li>-Summarize the treatment, using the Joe the Bum metaphor.</li><li>-Apply ACT processes to relapse management.</li><li>-Apply ACT processes to termination.</li><li>-Suggest a self-help workbook for continued progress.</li></ul> |
|--|--|--------------------------------------------------------------------------------------------------------------------------------------------------------------------------------------------------------------------------------------------------------------------------|

Figure S1 Study flowchart

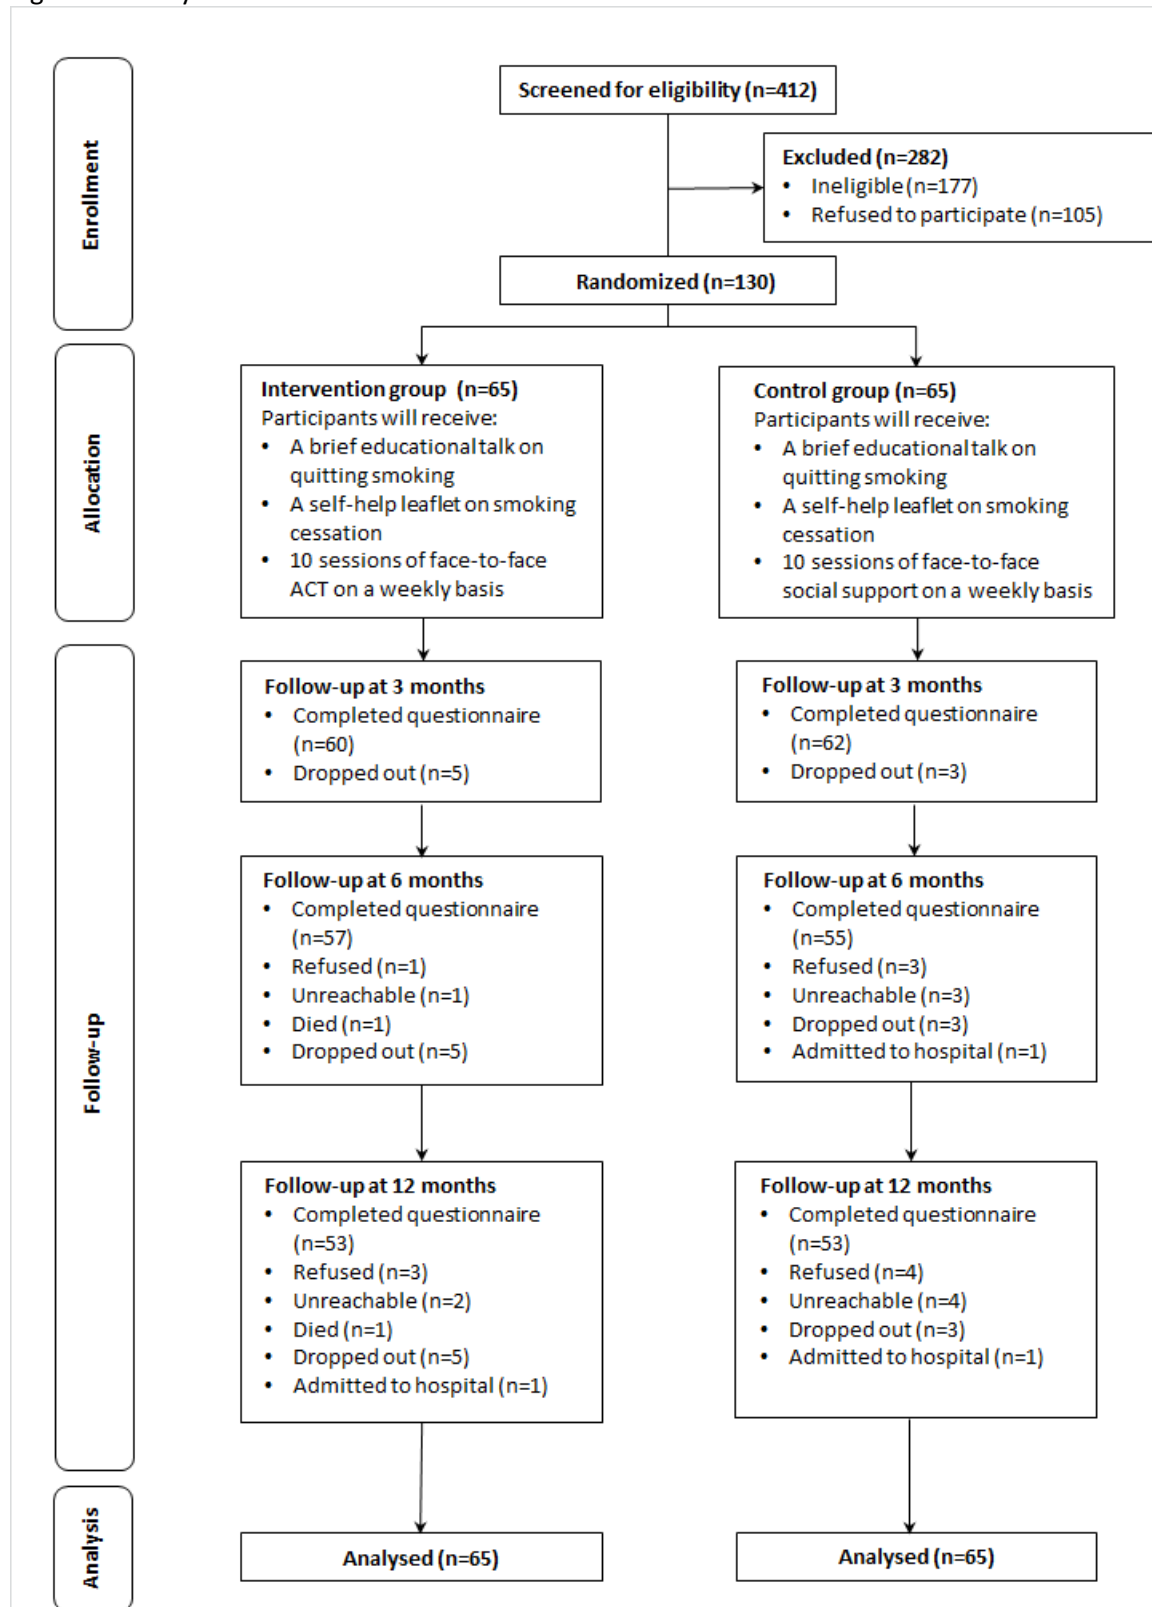

Supplement: s1 [file s1]
